# Supplementary material for: Deep post-GWAS analysis identifies potential risk genes and risk variants for Alzheimer’s disease, providing new insights into its disease mechanisms
Source: PubMed Central journal article supplement (PMC8519945; doi:10.1038/s41598-021-99352-3), 2021-10-15
Supplement: 41598_2021_99352_MOESM1_ESM.pdf [file 41598_2021_99352_MOESM1_ESM.pdf]

**Deep post-GWAS analysis identifies potential risk genes and risk variants for Alzheimer's disease, providing new insights into its disease mechanisms**

Zhen Wang<sup>1,2</sup>, Quanwei Zhang<sup>2</sup>, Jih-Rong Lin<sup>2</sup>, M.Reza Jabalameli<sup>2</sup>, Joydeep Mitra<sup>2</sup>, Nha Nguyen<sup>2</sup>, and Zhengdong Zhang<sup>2,§</sup>

<sup>1</sup> College of Animal Sciences, Zhejiang University, Hangzhou, Zhejiang, China.

<sup>2</sup> Department of Genetics, Albert Einstein College of Medicine, Bronx, New York, USA.

§ Corresponding author (E-mail: zhengdong.zhang@einstein.yu.edu)

**SUPPLEMENTARY FIGURES**

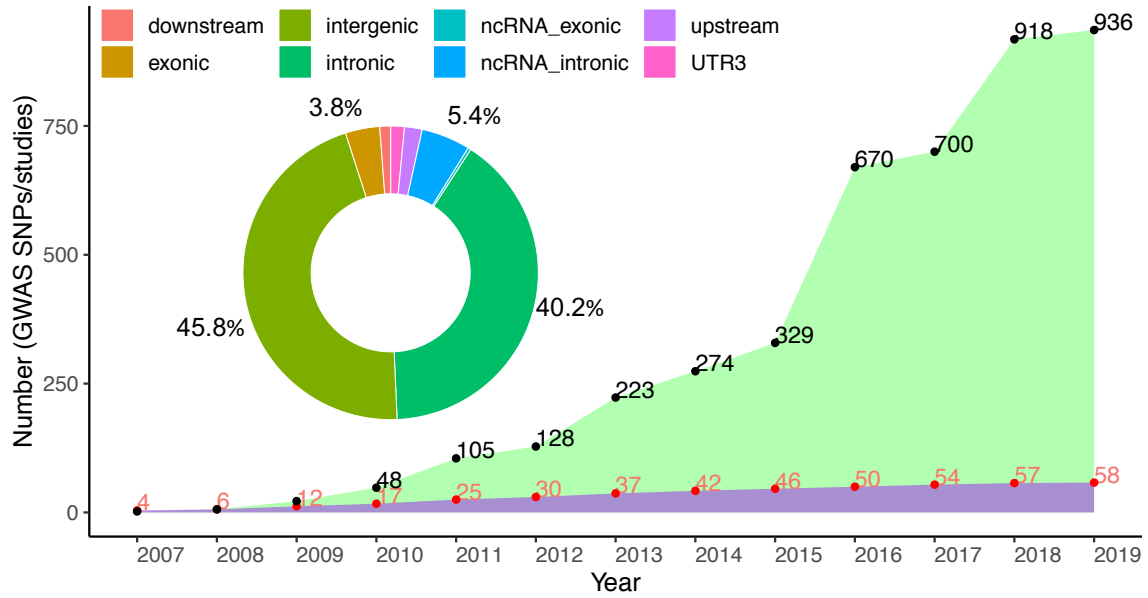

**Supplementary Fig S1. GWAS of AD since 2007.** The figure is based on data from the GWAS Catalog (1) (as of December 2018) and the latest GWAS of AD (2). The green area shows the total number of AD-associated SNPs, and the purple area shows the total number of GWAS of AD. The insert chart shows the proportions of different types of all 936 AD-associated SNPs.



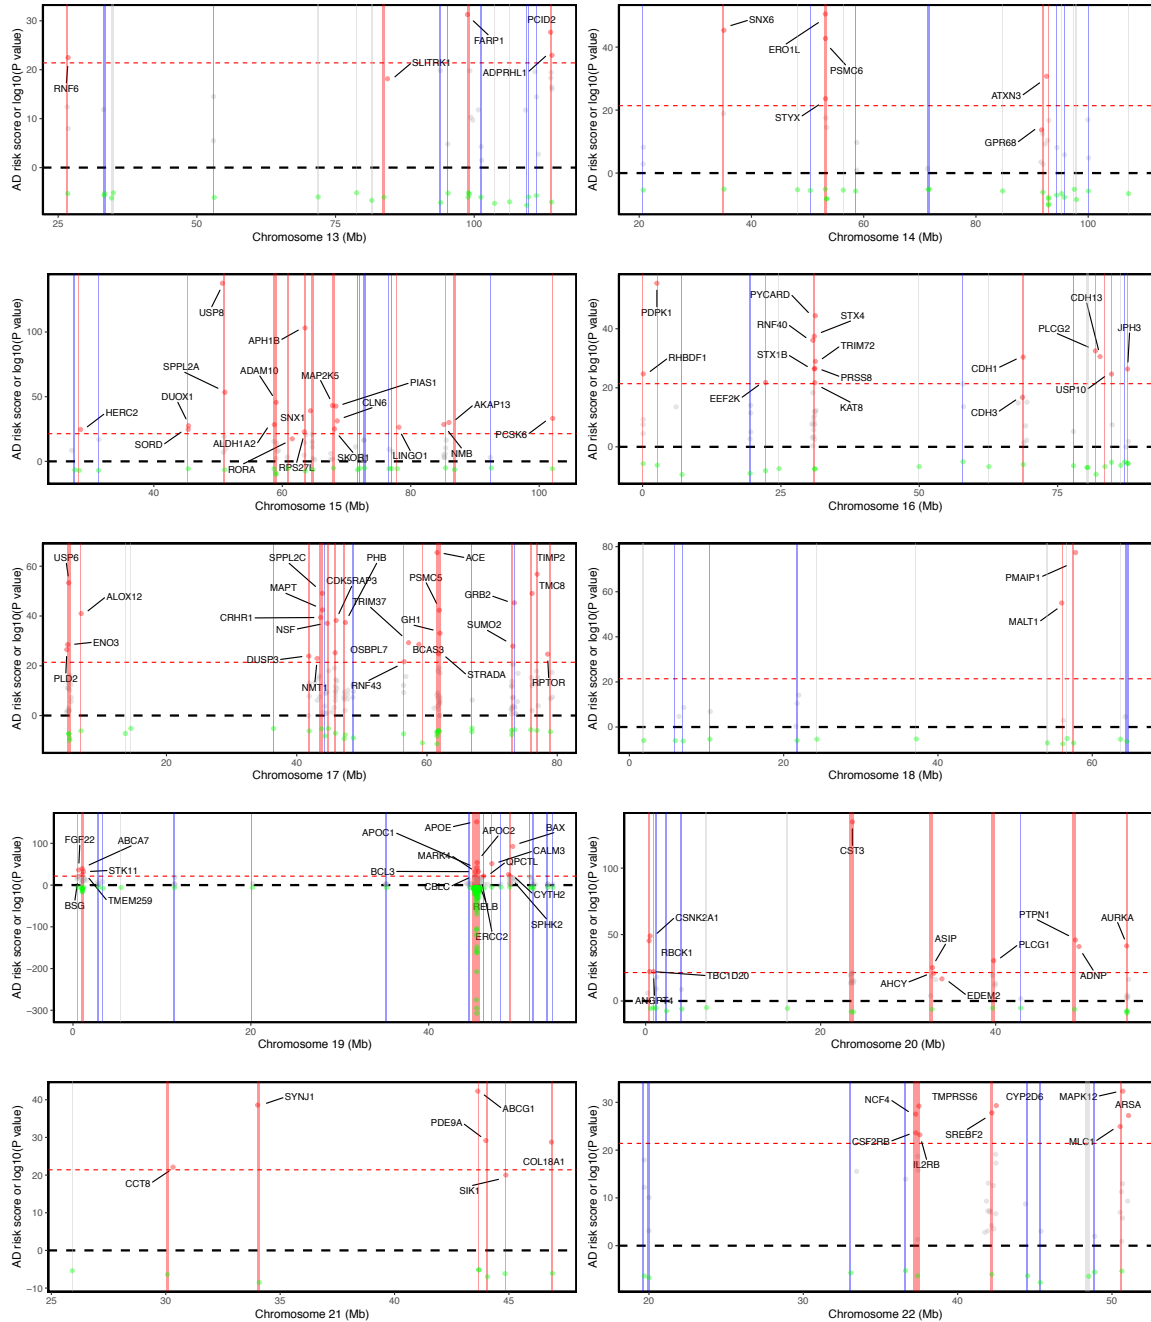

**Supplementary Fig S2. GWAS AD SNPs, AD risk regions, AD risk gene candidates, and predicted AD risk genes in each human autosome.** Green dots below the black dashed line represent GWAS AD SNPs and their  $\log_{10}P$  values. Above the black dashed line, gray dots represent AD risk gene candidates, and red ones predicted AD risk genes (labelled with gene symbols). The red dashed line marks the threshold for AD risk gene prediction based on the stringent training. AD risk genes below this threshold were predicted with the lenient training gene set. Vertical lines represent AD risk regions: red for risk regions with AD risk genes, blue for risk regions with only AD risk gene candidates, gray for risk regions without any AD risk gene candidates.

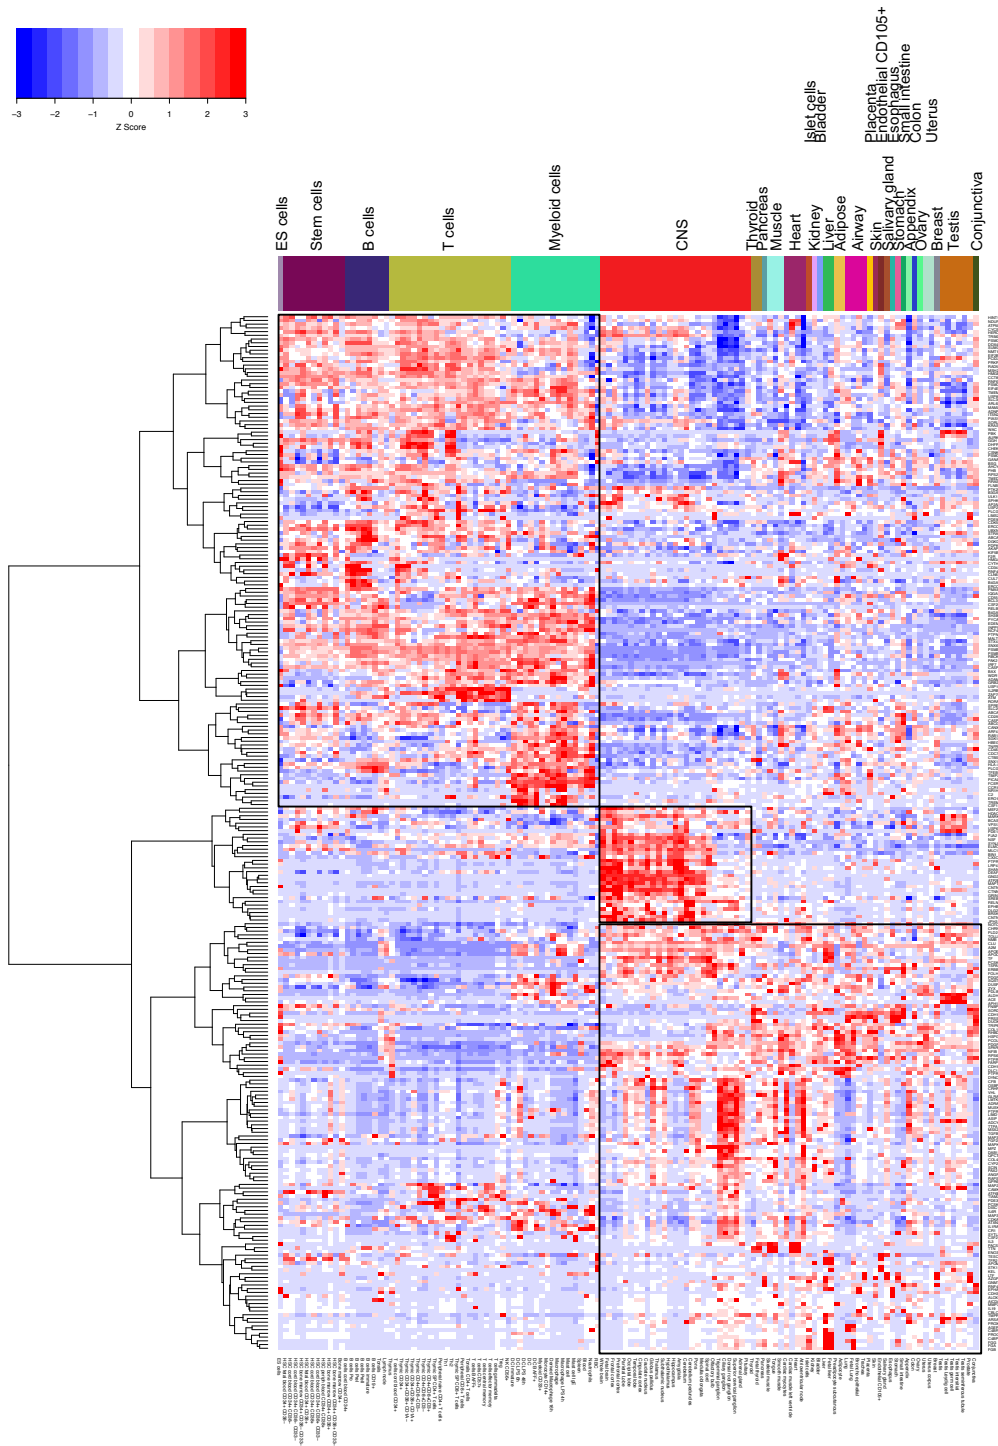

**Supplementary Fig S3. Expression of AD risk genes in different tissues.** Genes were clustered according to their expressions among different tissues. Three black boxes indicate gene clusters and corresponding tissues in which they are more transcriptionally active. 64 AD risk genes were not included due to the lack of data from the Gene Enrichment Profiler (<http://xavierlab2.mgh.harvard.edu/EnrichmentProfiler/help.html>).

The heatmap was plotted using R 'gplots' package (<https://github.com/talgalili/gplots>) with the 'heatmap.2' function.

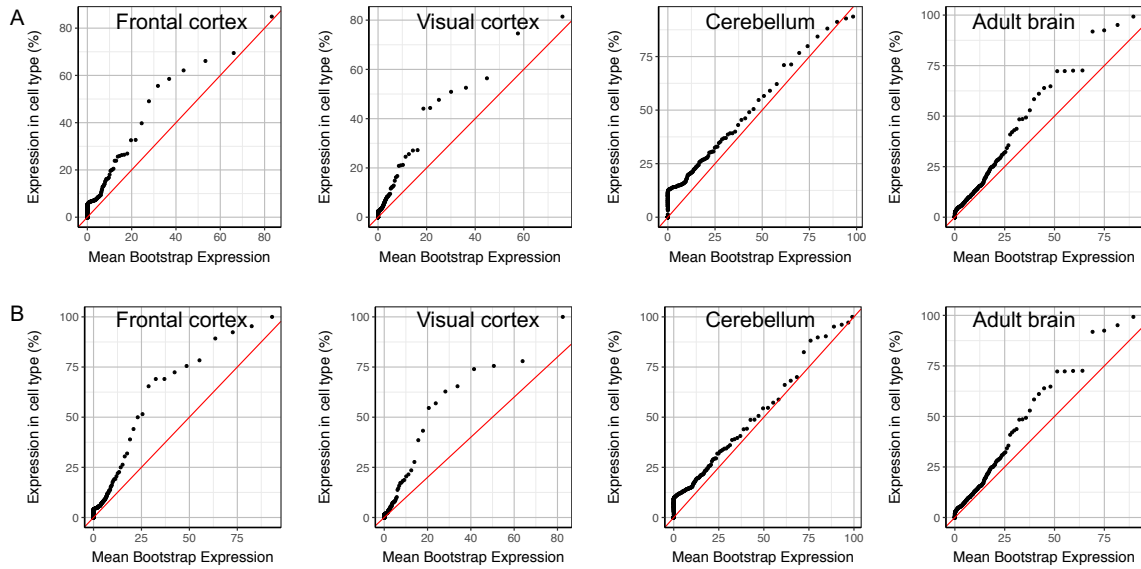

**Supplementary Fig S4. Enriched expression of AD risk genes in endothelia and microglia from different brain regions. (A) Endothelia. (B) Microglia.** The plot shows the actual level of expression of AD risk genes against the mean expression level of the *i*th most expressed gene in a bootstrapping analysis of the same number of genes. If the expression of AD risk genes was randomly distributed for a cell type from a brain region, the dots would be expected to fall along the red line. See Skene and Grant (3) for method details.

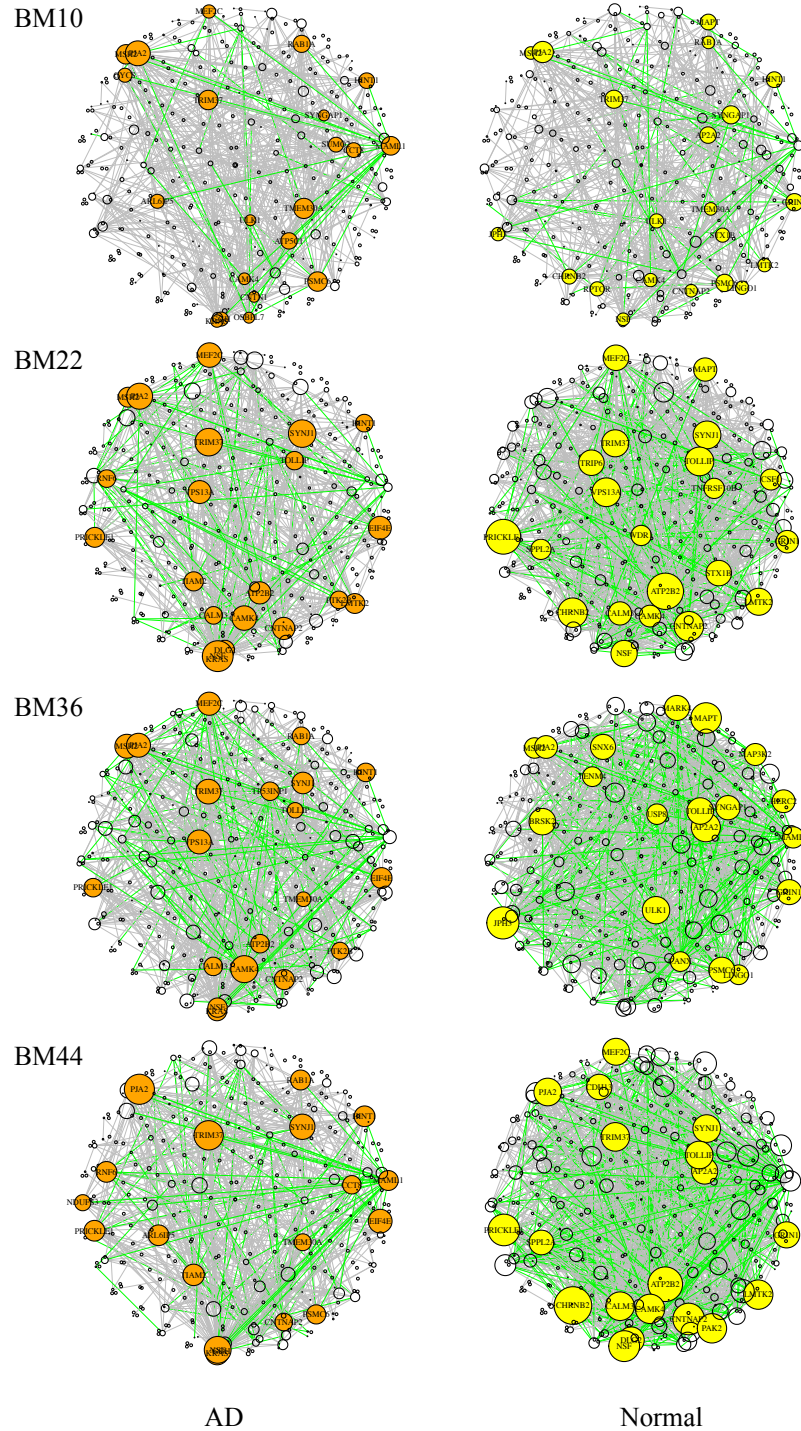

**Supplementary Fig S5. Co-expression networks of AD risk genes in both AD patients and normal controls.** Networks were constructed using the Pearson's correlation coefficients ( $> 0.7$ ). Positive and negative correlations are denoted by gray and green lines, respectively. The size of a node is proportional to the connectivity of the gene. The network hub genes are colored orange or yellow.



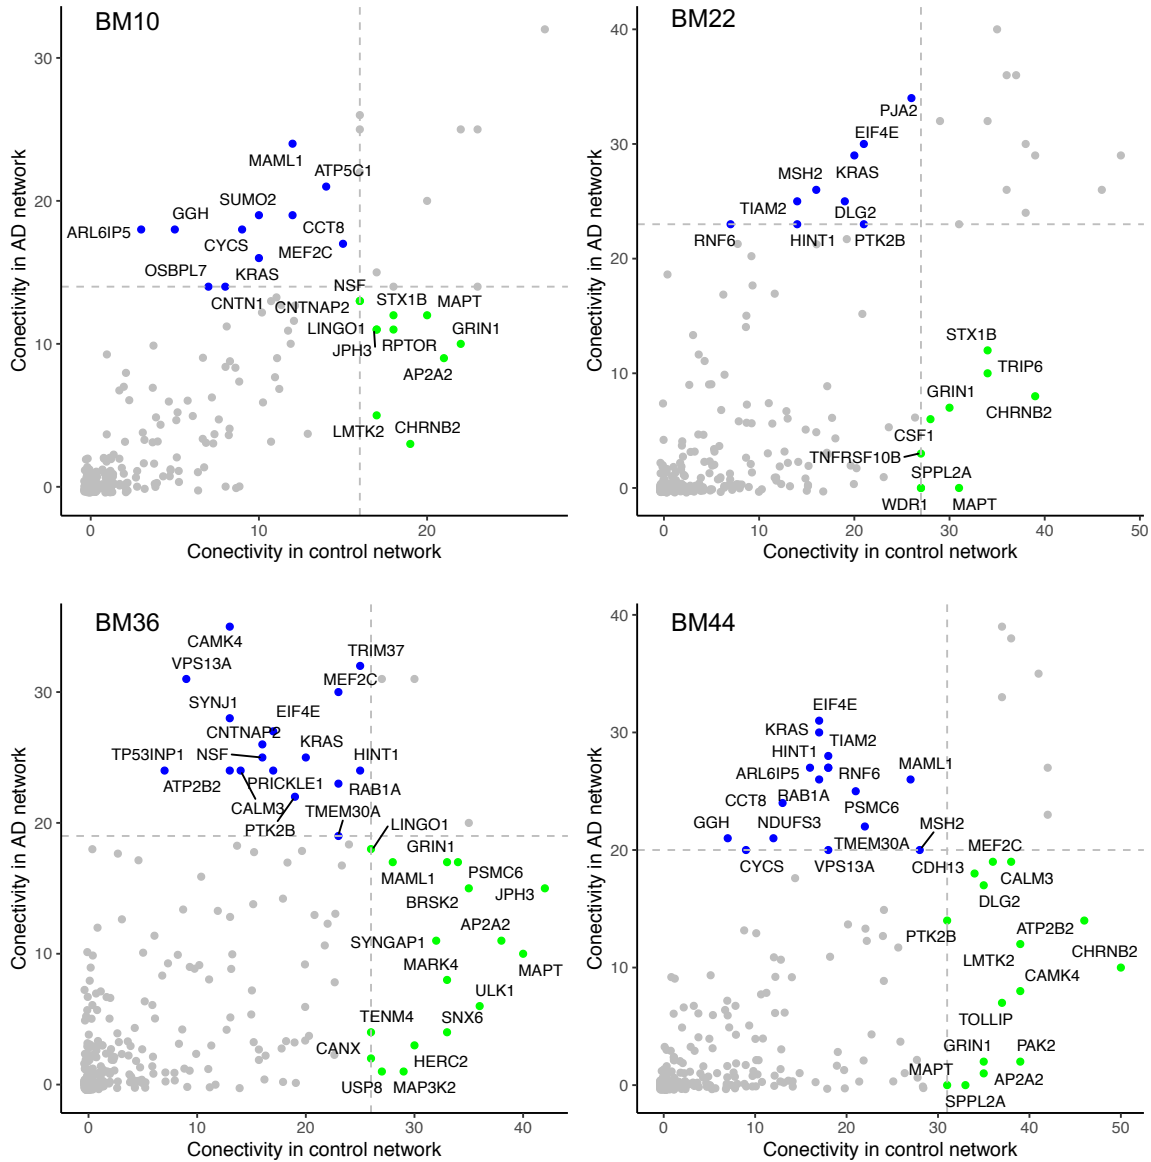

**Supplementary Fig S6. Network connectivity of AD risk genes in co-expression networks of both AD patients and normal controls.** Each dot represents an AD risk gene. The gray dashed line marks the threshold for network hub genes either in the co-expression network of AD patients or normal controls. Blue and green dots represent network hub genes only in the co-expression network of AD patients and only in the co-expression network of normal controls, respectively.

FC

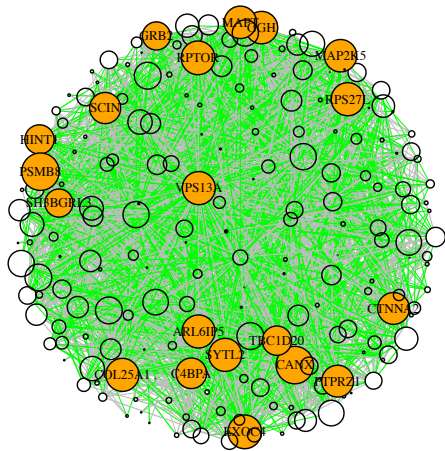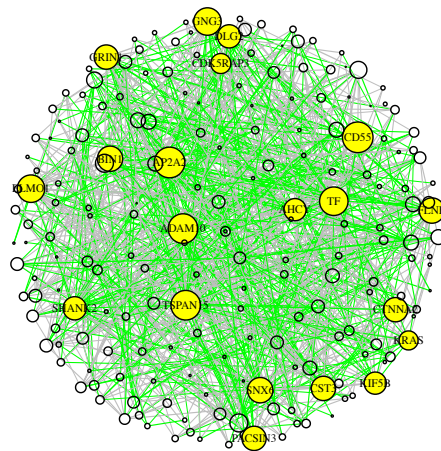

ACG

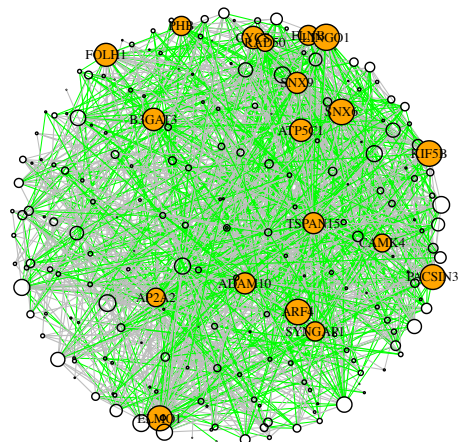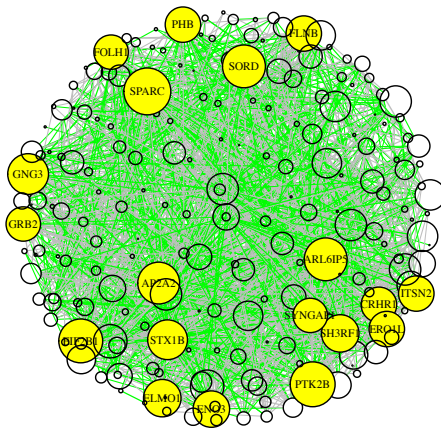

AD

Control

**Supplementary Fig S7. Co-expression networks of AD risk genes products in both AD patients and normal controls.** Co-expression networks were constructed using protein data and the Pearson's correlation coefficients ( $> 0.7$ ). Positive and negative correlations are denoted by gray and green lines, respectively. The size of a node is proportional to the connectivity of the gene. The network hub genes are colored orange or yellow.

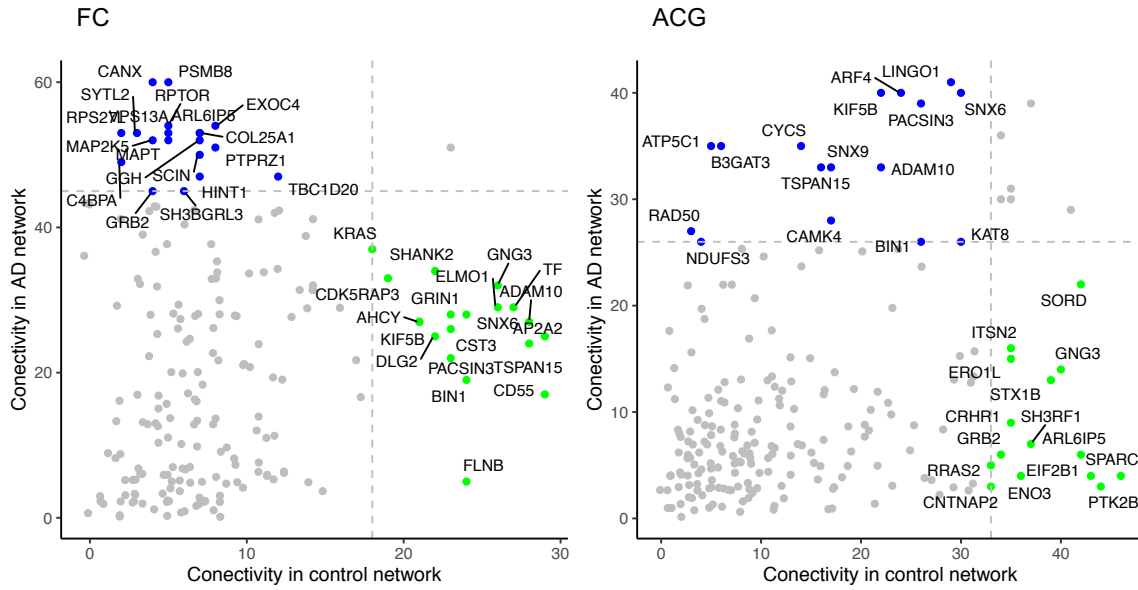

**Supplementary Fig S8. Network connectivity of AD risk genes in protein-based co-expression networks of both AD patients and normal controls.** Each dot represents an AD risk gene. The gray dashed line marks the threshold for network hub genes either in the co-expression network of AD patients or normal controls. Blue and green dots represent network hub genes only in the co-expression network of AD patients and only in the co-expression network of normal controls, respectively.

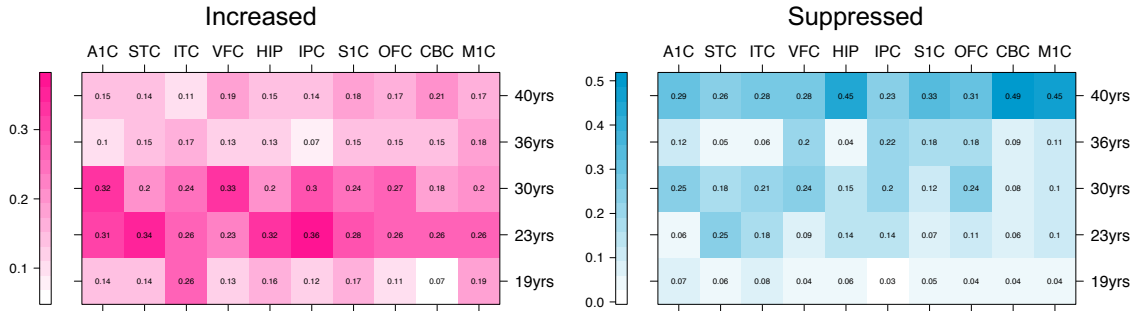

**Supplementary Fig S9. Spatiotemporal expression patterns of AD risk genes during brain development.** Both the active (red) and the suppressed (blue) gene expression were analyzed, using the same approach as in Lin et al. (4). Each heat maps shows gene expression at five developmental stages, in a chronological order, in ten brain regions. The shade of the color is proportional to the ratio of genes that manifest active (or suppressed) transcriptional activities, in the corresponding brain region and at the developmental stage, to the total number of AD risk genes. Abbreviations: A1C, primary auditory cortex (core); STC, posterior superior temporal cortex; ITC, inferior temporal cortex; VFC, ventrolateral prefrontal cortex; HIP, hippocampus; IPC, posteroventral (inferior) parietal cortex; S1C, primary somatosensory cortex (area S1, areas 3,1,2); OFC, orbitofrontal cortex; CBC, cerebellar cortex; M1C, primary motor cortex (area M1, area 4).

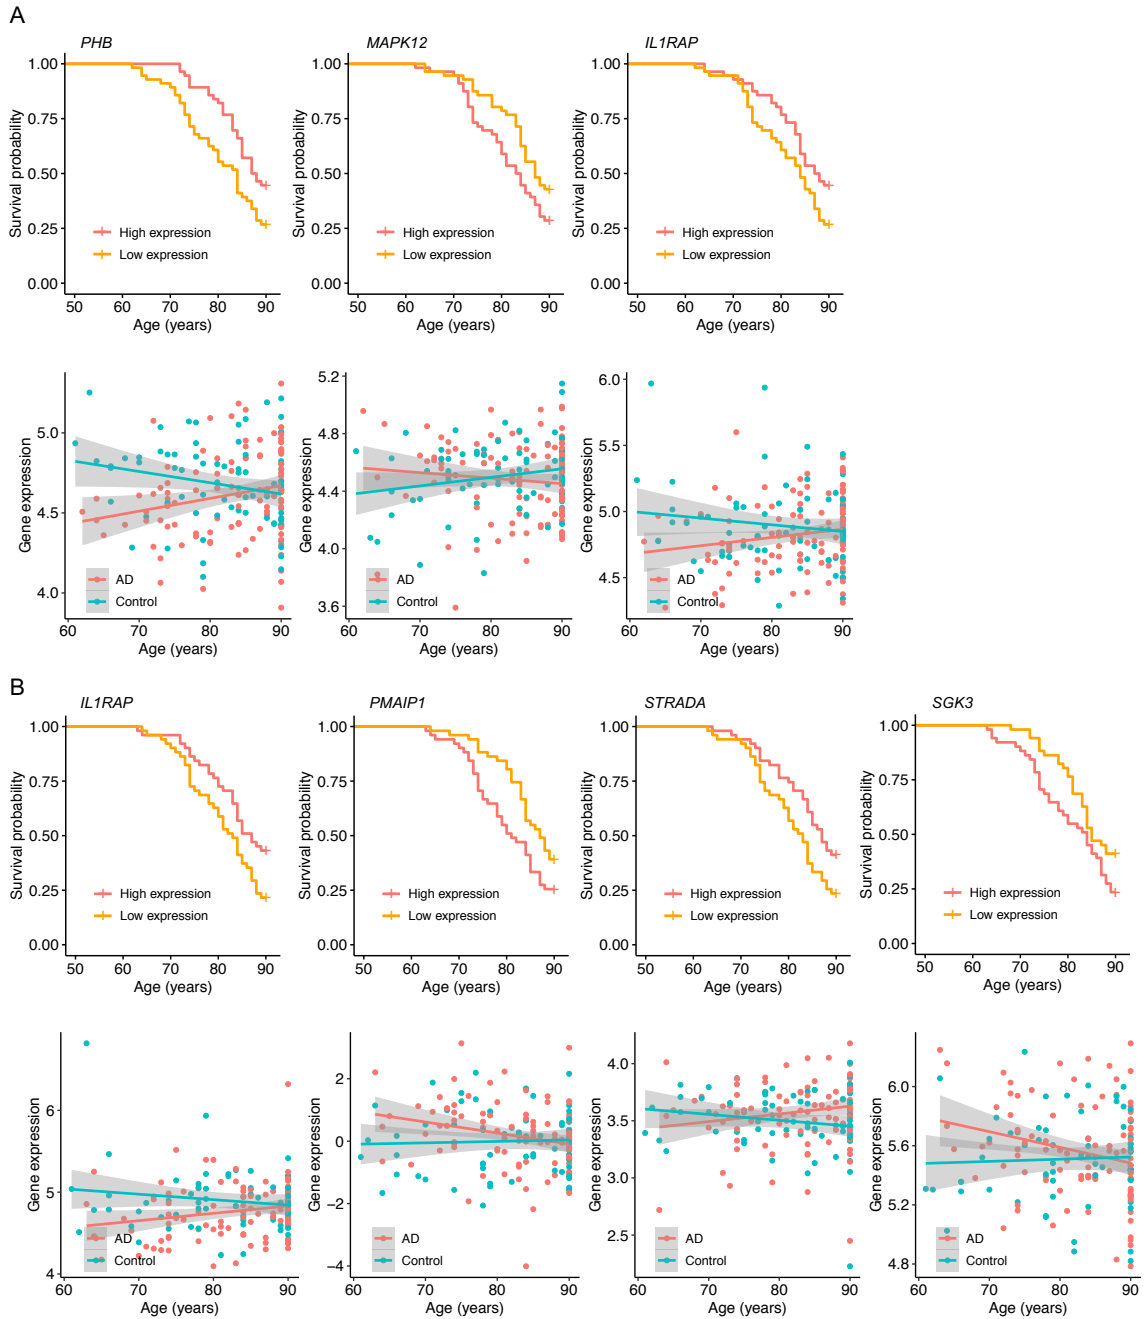

**Supplementary Fig S10. AD survival curves and gene expression trajectories accompany with age.** (A) BM10. (B) BM22. There are additional six genes, not shown in Fig 5, whose expression affects the survival of AD patients with low and high expression levels and shows opposite expression trajectories with age in AD patients and normal controls.

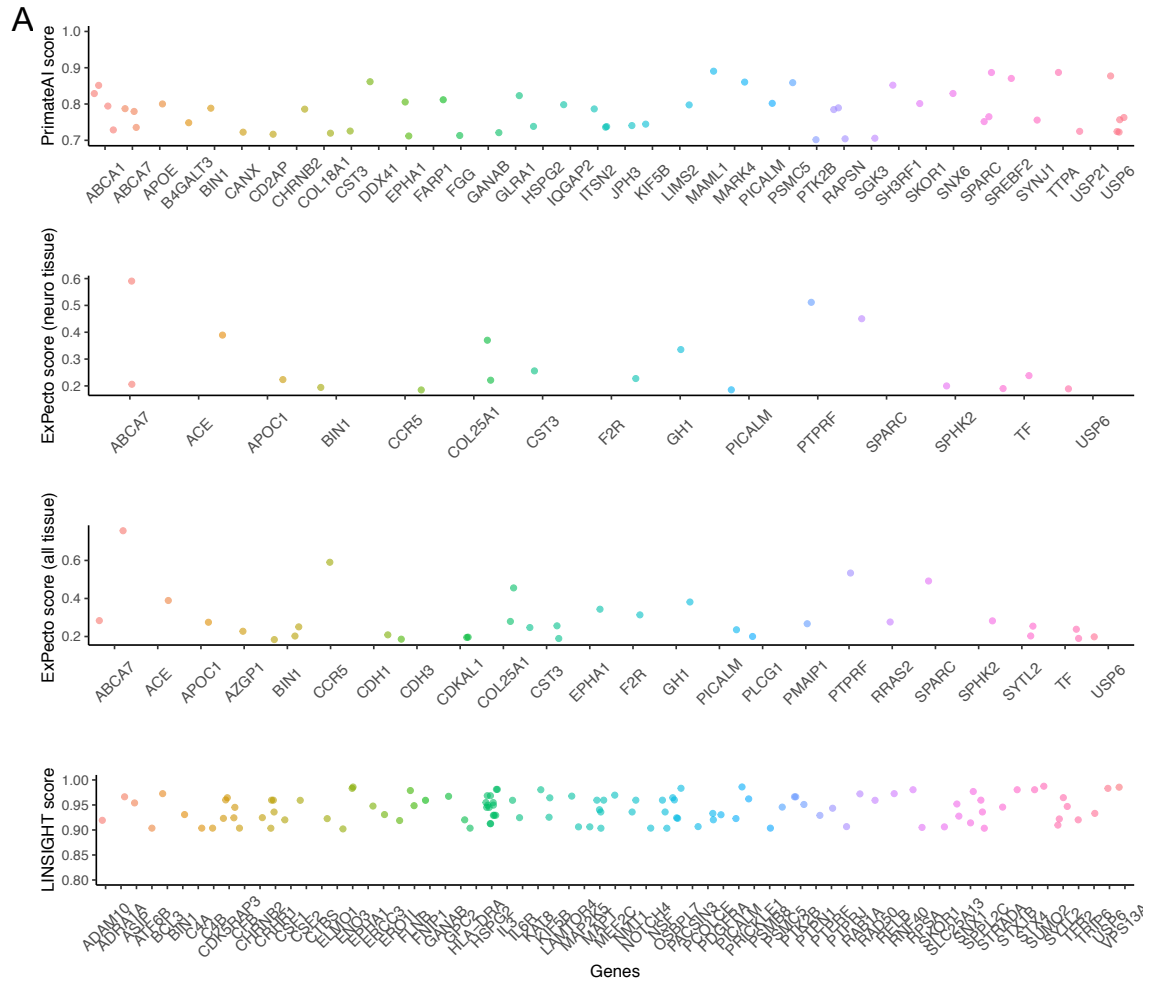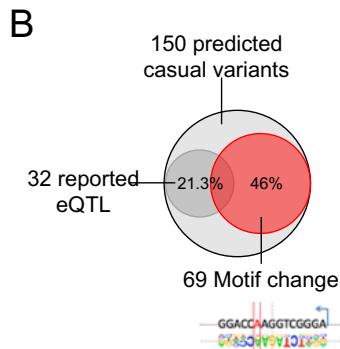

**Supplementary Fig S11. Predicted AD risk variants.** (A) AD risk genes, risk variants, and their functional scores. For promoter variants, we used ExPecto scores from both all or neuro tissues. (B) Functional annotation of predicted risk variants. ~57% (85/150) of them are either known eQTLs or predicted to change TFBS motifs.

## REFERENCES

1. MacArthur, J., Bowler, E., Cerezo, M., Gil, L., Hall, P., Hastings, E., Junkins, H., McMahon, A., Milano, A., Morales, J. *et al.* (2017) The new NHGRI-EBI Catalog of published genome-wide association studies (GWAS Catalog). *Nucleic Acids Res*, **45**, D896-D901.
2. Jansen, I.E., Savage, J.E., Watanabe, K., Bryois, J., Williams, D.M., Steinberg, S., Sealock, J., Karlsson, I.K., Hagg, S., Athanasiu, L. *et al.* (2019) Genome-wide meta-analysis identifies new loci and functional pathways influencing Alzheimer's disease risk. *Nat Genet*.
3. Skene, N.G. and Grant, S.G. (2016) Identification of Vulnerable Cell Types in Major Brain Disorders Using Single Cell Transcriptomes and Expression Weighted Cell Type Enrichment. *Front Neurosci*, **10**, 16.
4. Lin, J.R., Cai, Y., Zhang, Q., Zhang, W., Nogales-Cadenas, R. and Zhang, Z.D. (2016) Integrated Post-GWAS Analysis Sheds New Light on the Disease Mechanisms of Schizophrenia. *Genetics*, **204**, 1587-1600.
